# Supplementary figures and images for: An Online Survey of New Zealand Vapers
Source: MDPI journal article supplement (doi:10.3390/ijerph15020222), 2018-01-29

# Vaping Starts: N=218

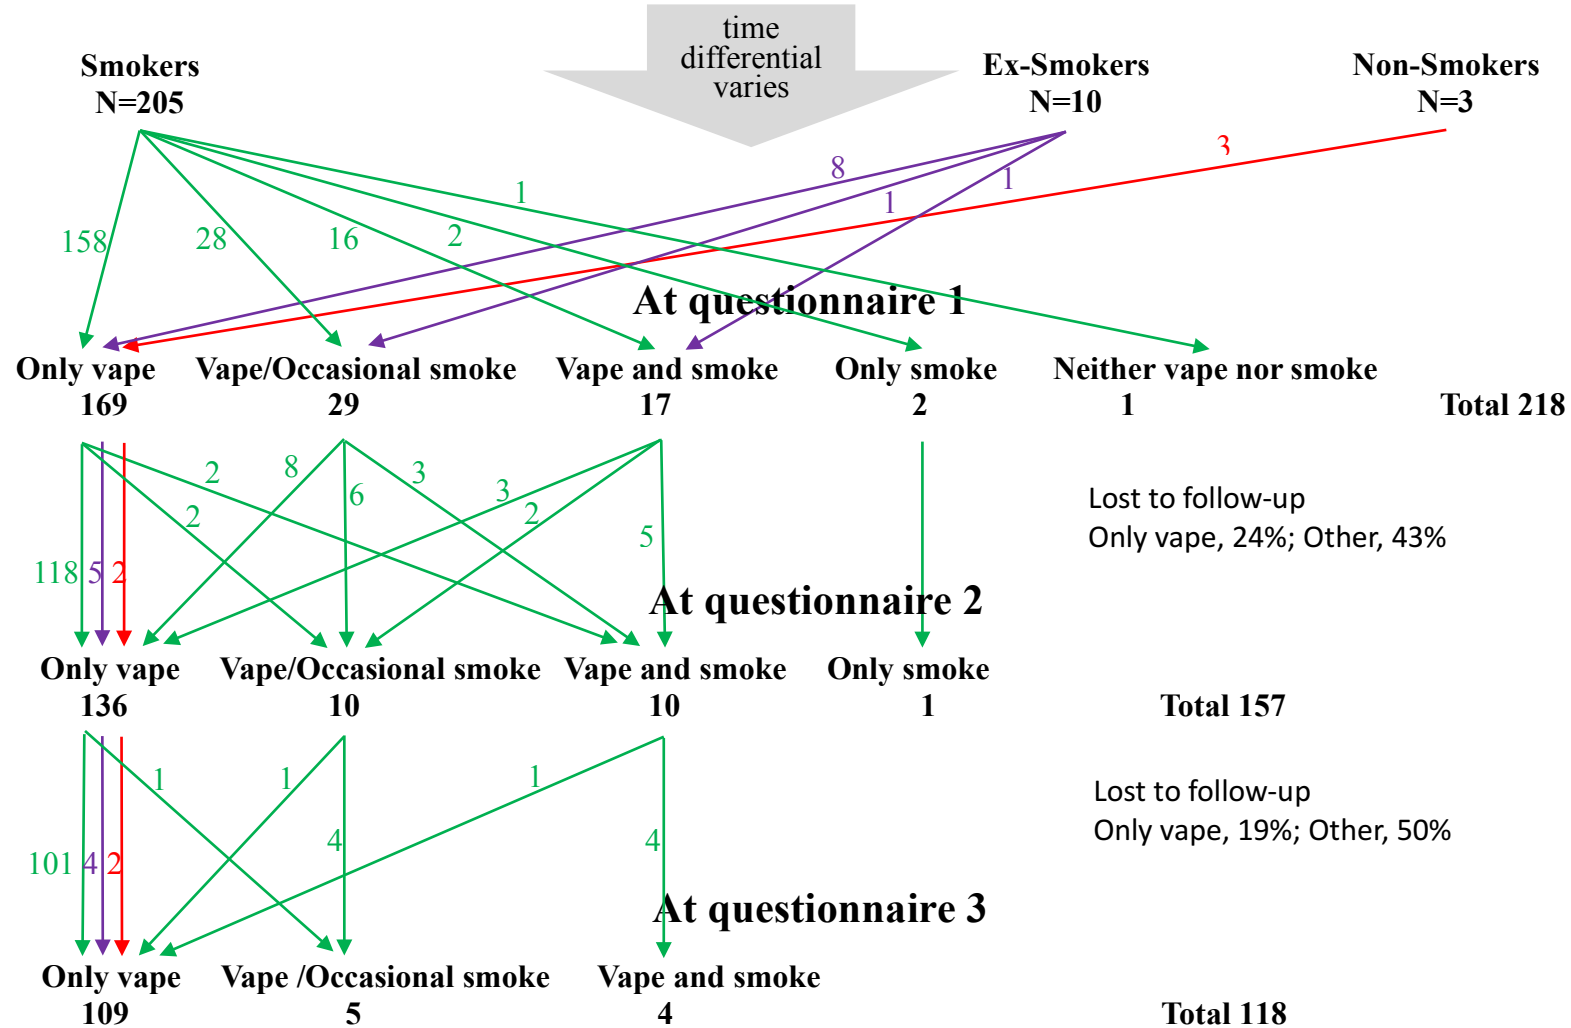

Supplement: s1 [file s1]
